# Supplementary material for: SimFuse: A Novel Fusion Simulator for RNA Sequencing (RNA-Seq) Data
Source: Biomed Res Int. 2015 Dec 29;2015:780519. doi: 10.1155/2015/780519 (PMC4709598; doi:10.1155/2015/780519)
Supplement: Supplementary file 2 [file 780519.f2.xlsx]

## Sheet: Simulation matrix example
Split:Span Per Fusion	1 : 0	3 : 1	5 : 1	7 : 2	10 : 3	15 : 4	20 : 5	30 : 8	50 : 13	100 : 26
Sim #1	100 fusions	100 fusions	100 fusions	100 fusions	100 fusions	100 fusions	100 fusions	100 fusions	100 fusions	100 fusions
Sim #2	100 fusions	100 fusions	100 fusions	100 fusions	100 fusions	100 fusions	100 fusions	100 fusions	100 fusions	100 fusions
……	……	……	……	……	……	……	……	……	……	……
Sim #100	100 fusions	100 fusions	100 fusions	100 fusions	100 fusions	100 fusions	100 fusions	100 fusions	100 fusions	100 fusions
