# Supplementary material for: SimFuse: A Novel Fusion Simulator for RNA Sequencing (RNA-Seq) Data
Source: Biomed Res Int. 2015 Dec 29;2015:780519. doi: 10.1155/2015/780519 (PMC4709598; doi:10.1155/2015/780519)
Supplement: Supplementary file 3 [file 780519.f3.xlsx]

## Sheet: Recall, precision distribution
Recall:			deFuse			TophatFusion
	Split #	Span #	recall_fusion	Standard Deviation	95%CI	recall_fusion	Standard Deviation	95%CI
	1	0	0	0	0	0	0	0
	3	1	0	0	0	0.7545	0.0416424	0.00816176
	5	1	0.0002	0.00140705	0.000275777	0.7946	0.0348277	0.00682611
	7	2	0.0087	0.00895048	0.00175426	0.8127	0.0381347	0.00747426
	10	3	0.0894	0.0337794	0.00662065	0.8222	0.0309636	0.00606876
	15	4	0.3386	0.0514246	0.010079	0.8327	0.036261	0.00710702
	20	5	0.7446	0.0689667	0.0135172	0.8395	0.0387266	0.00759027
	30	8	0.7865	0.0663687	0.013008	0.8366	0.0364933	0.00715255
	50	13	0.8209	0.0594435	0.0116507	0.845	0.0361115	0.00707772
	100	26	0.8433	0.060437	0.0118454	0.8398	0.0329671	0.00646143
Precision			deFuse			TophatFusion
	Split #	Span #	precision_fusion	Standard Deviation	95%CI	precision_fusion	Standard Deviation	95%CI
	1	0	0	0	0	NA	NA	NA
	3	1	0	0	0	0.986096	0.0132475	0.00259645
	5	1	0.0263158	0.147026	0.0381684	0.984629	0.0132186	0.0025908
	7	2	0.501961	0.403764	0.0858353	0.983914	0.0124722	0.00244451
	10	3	0.871298	0.112024	0.0219562	0.980094	0.0139704	0.00273815
	15	4	0.931043	0.0428519	0.00839882	0.979396	0.0145675	0.00285518
	20	5	0.944553	0.0268786	0.00526811	0.978112	0.0144302	0.00282827
	30	8	0.947042	0.0245242	0.00480666	0.978663	0.0155643	0.00305055
	50	13	0.95107	0.0220629	0.00432424	0.976624	0.0142416	0.00279131
	100	26	0.947746	0.0290341	0.00569057	0.978201	0.0174205	0.00341435
